# Supplementary material
Source: publisher site journal article supplement (https://www.dovepress.com/article/444800)
Supplement: Supplementary file 1 [file get_supplementary_file.php]

Supplement 1. List of potential attributes and levels

| Potential Attributes | Potential level |
| --- | --- |
| Degree of side effects | Mild,  Moderate,  Severe |
| Types of side effects | Gastrointestinal reactions,  Endocrine changes,  Fatigue,  Dysfunction,  Weight changes |
| Frequency of follow-up management | Once every two weeks,  Once every four weeks,  Once every six weeks |
| Treatment duration | Three months, six months；  Nine months;  Twelve months and above |
| Drug dosage form | Tablets,  Powders,  Capsules,  Liquids |
| Psychological support | Yes,  No |
| Cost(￥) | 400、600、800 |
| Storage conditions | No special requirements,  With special requirements |
